# Supplementary material for: Remarkable Recycling Process of ZnO Quantum Dots for Photodegradation of Reactive Yellow Dye and Solar Photocatalytic Treatment Process of Industrial Wastewater
Source: MDPI journal article supplement (doi:10.3390/nano12152642), 2022-07-31
Supplement: s1 [file s1]

**Table S1.** COD values of real industrial wastewater using commercial nano zinc oxide, and ZQDs samples during photocatalysis by Sunlight.

| Investigated Date | COD before treatment | COD Value (ppm) |             |                     |
|-------------------|----------------------|-----------------|-------------|---------------------|
|                   |                      | Z1 (6.9 nm)     | Z2 (8.3 nm) | Nano ZnO (25–30 nm) |
| 3/2/2021          | 7020                 | 790             | 978         | 1299                |
| 4/2/2021          | 6875                 | 737             | 892         | 1152                |
| 7/2/2021          | 6378                 | 658             | 808         | 925                 |
| 8/2/2021          | 6544                 | 702             | 842         | 954                 |
| 9/2/2021          | 6101                 | 620             | 775         | 887                 |

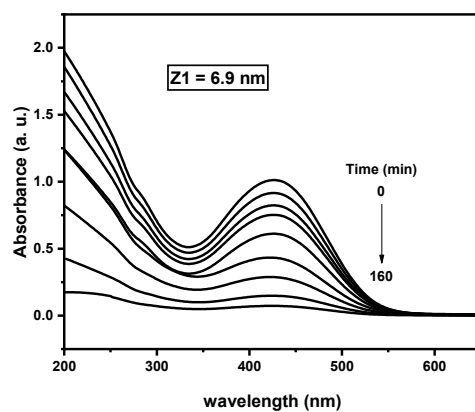

**Figure S1.** Absorption spectra for photodegradation process of Reactive Yellow Dye in presence of  $Z1 = 6.9 \text{ nm}$

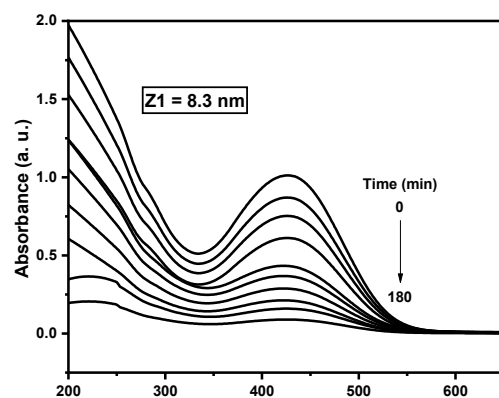

**Figure S2.** Absorption spectra for photodegradation process of Reactive Yellow Dye in presence of Z2 = 8.3 nm
